1 **Selection signatures in worldwide sheep populations**

2 Maria-Ines Fariello<sup>1,2,3</sup>, Bertrand Servin<sup>1</sup>, Gwenola Tosser-Klopp<sup>1</sup>, Rachel Rupp<sup>1</sup>, Carole Moreno<sup>1</sup>,

3 International Sheep Genomics Consortium<sup>4</sup>, Magali SanCristobal<sup>1</sup>, Simon Boitard<sup>5,6,\*</sup>

4 **1 Génétique, Physiologie et Systèmes d'Élevage, INRA & ENVT & ENSAT,**

5 **Castanet-Tolosan, France**

6 **2 IMERL, Facultad de Ingeniera, Universidad de la Republica, Montevideo, Uruguay**

7 **3 Bioinformatics Unit, Institut Pasteur, Montevideo, Uruguay**

8 **4 [www.sheephapmap.org](http://www.sheephapmap.org)**

9 **5 Génétique Animale et Biologie Intégrative, INRA & AgroParisTech, Jouy-en-Josas,**

10 **France**

11 **6 Origine, Structure et Evolution de la Biodiversité, Museum National d'Histoire**

12 **Naturelle & EPHE & CNRS, Paris, France**

13 **\* Corresponding Author: [sboitard@mnhn.fr](mailto:sboitard@mnhn.fr)**

14

## Abstract

15

16

17

18

19

20

21

22

23

24

25

The diversity of populations in domestic species offers great opportunities to study genome response to selection. The recently published Sheep HapMap dataset is a great example of characterization of the world wide genetic diversity in sheep. In this study, we re-analyzed the Sheep HapMap dataset to identify selection signatures in worldwide sheep populations. Compared to previous analyses, we made use of statistical methods that (i) take account of the hierarchical structure of sheep populations, (ii) make use of linkage disequilibrium information and (iii) focus specifically on either recent or older selection signatures. We show that this allows pinpointing several new selection signatures in the sheep genome and distinguishing those related to modern breeding objectives and to earlier post-domestication constraints. The newly identified regions, together with the ones previously identified, reveal the extensive genome response to selection on morphology, color and adaptation to new environments.

26

## Introduction

27

28

29

30

31

32

33

34

35

36

37

38

39

40

41

42

Domestication of animals and plants has played a major role in human history. With the advance of high-throughput genotyping and sequencing technologies, the analysis of large datasets in domesticated species offers great opportunities to study genome evolution in response to phenotypic selection [1]. The sheep was one of the first grazing animals to be domesticated [2] in part due to its manageable size and an ability to adapt to different climates and diets with poor nutrition. A large variety of breeds with distinct morphology, coat color or specialized production (meat, milk or wool) were subsequently shaped by artificial selection. Since the release of the 50K SNP array [3], it is now possible to scan genetic diversity in sheep in order to detect loci that have been involved in these various adaptive selection events. The Sheep HapMap dataset, which includes 50K genotypes for 3000 animals from 74 breeds with diverse world-wide origins, provides a considerable resource for deciphering the genetic bases of phenotype diversification in sheep. In the first analysis of this dataset [4], the authors looked for selection by computing a global  $F_{ST}$  among the 74 breeds at all SNP in the genome. They identified 31 genome regions with extreme differentiation between breeds, which included candidate genes related to coat pigmentation, skeletal morphology, body size, growth, and reproduction. Further studies took advantage of the Sheep HapMap resource to detect genetic variants associated with pigmentation [5], fat deposition [6], or microphthalmia disease [7]. An other study [8] performed a genome scan for selection focused on American synthetic

43 breeds, using an  $F_{ST}$  approach similar to that in [4].

44 The 74 breeds of the Sheep HapMap dataset have a strong hierarchical structure, with at least 3  
45 distinct differentiation levels: an inter-continental level (e.g. European breeds vs Asian breeds), an intra-  
46 continental level (e.g. Texel vs Suffolk European breeds), and an intra-breed level (e.g. German Texel  
47 vs Scottish Texel flocks). Recent studies [9–12] showed that, when applied to hierarchically structured  
48 data sets,  $F_{ST}$  based genome scans for selection may lead to a large proportion of false positives (neutral  
49 loci wrongly detected as under selection) and false negatives (undetected loci under selection). Besides,  
50 the heterogeneity of effective population size among breeds implies that some breeds are more prone to  
51 contribute large locus-specific  $F_{ST}$  values than others [10]. Apart from these statistical considerations,  
52 merging populations with various degrees of shared ancestry can limit our understanding of the selective  
53 process at detected loci. Indeed, the regions pointed out in [4] can be related to either ancient selection,  
54 as the poll locus which has likely been selected for thousands of years, or fairly recent selection, as the  
55 myostatin locus which has been specifically selected in the Texel breed. But in most situations the time  
56 scale of adaptation cannot be easily determined.

57 Another limit of genome scans for selection based on single SNP  $F_{ST}$  computations is that they do  
58 not sufficiently account for the very rich linkage disequilibrium information, even when the single SNP  
59 statistics are combined into windowed statistics. Recently, we proposed a new strategy to evaluate the  
60 haplotype differentiation between populations [13]. We showed that using this approach greatly increases  
61 the detection power of selective sweeps from SNP chip data, and also enables to detect soft or incomplete  
62 sweeps. These latter selection scenarios are particularly relevant in breeding populations, where selection  
63 objectives have likely varied along time and where the traits under selection are often polygenic.

64 In this study we provide a new genome scan for selection based on the Sheep HapMap dataset, where  
65 we distinguish selective sweeps within and between 7 broad geographical groups. The within group  
66 analysis aims at detecting recent selection events related to the diversification of modern breeds. It is  
67 based on the single marker FLK test [10] and on its haplotypic extension hapFLK [13]. The FLK test is  
68 an extension of the Lewontin and Krakauer (LK) test [14] that accounts for population size heterogeneity  
69 and for the hierarchical structure between populations. As the LK test, the FLK test computes a global  
70  $F_{ST}$  for each SNP, but allele frequencies are first rescaled using a population kinship matrix  $F$ . This  
71 matrix, which is estimated from the observed genome wide data, measures the amount of genetic drift that  
72 can be expected, under neutral evolution, along all branches of the population tree. With this rescaling,

73 allele frequency differences are typically down-weighted if they are obtained with small populations, or  
74 populations that diverged a long time ago. The between group analysis focuses on older selection events  
75 and is only based on FLK. Overall, we confirmed 19 of the 31 sweeps discovered in [4], while providing  
76 more details about the past selection process at these loci. We also identified 71 new selection signatures,  
77 with candidate genes related to coloration, morphology or production traits.

## 78 **Results and discussion**

79 We detected selection signatures using methods that aim at identifying regions of outstanding genetic  
80 differentiation between populations, based either on single SNP, FLK [10], or haplotype, hapFLK [13],  
81 information. These methods have optimal power when working on closely related populations so we  
82 separately analyzed seven groups of breeds, previously identified as sharing recent common ancestry  
83 [4] and corresponding to geographical origins of breeds. Before performing genome scans for selection  
84 signatures, we studied the population structure of each group to identify outlier animals as well as  
85 admixed and strongly bottlenecked populations, using both PCA and model-based approaches [15,16].  
86 hapFLK was found to be robust to bottlenecks or moderate levels of admixture, but these phenomena  
87 may affect the detection power so we preferred to minimize their influence by removing suspect animals  
88 or populations. Details of these corrections are provided in the methods section. The final composition  
89 of population groups are given in Table 1.

### 90 **Overview of selected regions**

91 An overview of selection signatures on the genome across the different groups is plotted in Figure 1 and  
92 a detailed description is provided in Table 2. Detected regions were typically a few megabases long and  
93 included from 1 to 196 genes, with a median of 15 genes. However, in many regions strong functional  
94 candidate genes were found very close to the position with lowest p-value, typically among the two  
95 closest genes from this position. These genes are reported in Table 2, as well as a few other functional  
96 candidates with less statistical evidence but strong prior knowledge from the literature. We found 41  
97 selection signatures with hapFLK and 26 with FLK, although we allowed a slightly higher false discovery  
98 rate for FLK than hapFLK (10% vs 5%). This result was consistent with a higher power for hapFLK  
99 than FLK, as already shown in [13].

100 Four regions were found with both the single SNP and the haplotype test and harbor strong candidate  
101 genes: NPR2, KIT, RXFP2 and EDN3 (Table 2). The overlap was thus small, illustrating that the two  
102 tests tend to capture different signals. In particular, hapFLK will fail to detect ancient selective sweeps,  
103 for which the mutation-carrying haplotype is small and not associated with many SNP on the chip. On  
104 the contrary, single SNP tests will fail to capture selective sweeps when a single SNP is not in high LD  
105 with the causal mutation. They will also fail if the selected mutation is only at intermediate frequency  
106 but is associated to a long haplotype, in contrast with hapFLK.

107 Six regions were detected in more than one group of breeds. They all contained strong candidate  
108 genes (Table 2). Three of these genes are related to coat color (KIT, KITLG and MC1R), and could  
109 correspond to independent selection events (see discussion below). One region harbors a gene (RXFP2) for  
110 which polymorphisms have been shown to affect horn size and polledness in the Soay [17] and Australian  
111 Merino [18]. We detected this region in 4 different groups and in all of them the highest FLK value was  
112 found to be very close to RXFP2 (Figure S8). This provides clear evidence that selection in this region  
113 is related to RXFP2, consistent with previous selection signatures detected by comparing specifically  
114 horned and polled breeds (Figure 6 in [4]). However, we note that the signatures of selection in this  
115 region exhibit different patterns among groups. The signal is very narrow in the SWE and SWA groups,  
116 and is in fact not detected by the hapFLK test, whereas it affects a large genome region in the CEU  
117 group where it is detected by hapFLK. In the ITA group, the FLK statistics do not reach significance,  
118 and the hapFLK signal is not high (minimum q-value of 0.04). Overall, the selection signatures suggest  
119 that selection on RXFP2, most likely due to selection on horn phenotypes, was carried out worldwide  
120 at different times and intensities. Another region harbors the HMGA2 gene, involved in selection for  
121 stature in dogs [19]. The last region includes two interesting candidate genes : ABCG2, which has been  
122 associated to a strong QTL for milk production in cattle [20], and NCAPG, which has been associated  
123 to fetal growth [21] and calving ease [22] in cattle and which is located in several selection signatures in  
124 this species [23–26]. In our analysis, populations with a selection signature in this region belong to three  
125 European groups (SWE, ITA and CEU) and our results suggest that selection in these different groups  
126 might imply distinct genes (Table 2).

127 In the paper presenting the Sheep HapMap dataset [4], 31 selection signatures were found, correspond-  
128 ing to the 0.1% highest single SNP  $F_{ST}$ . Using FLK and hapFLK, we confirmed signatures of selection  
129 for 10 of these regions. Considering the two analyses were performed on the same dataset, this overlap

130 can be considered as rather small. Two reasons can explain this.

131 First, the previous analysis was based on the  $F_{ST}$  statistic. Although this statistic is commonly used  
132 for selection scans, it is prone to produce false positives when the population tree harbors unequal branch  
133 lengths (*i.e.* unequal effective population sizes) [10]. In particular, strongly bottlenecked breeds will  
134 contribute high  $F_{ST}$  values preferentially even under neutral evolution, because their smaller effective  
135 population size implies a larger variance of allele frequencies. With  $FLK$  and  $hapFLK$ ,  $F_{ST}$  values  
136 between populations are rescaled using branch lengths, so populations with long branch lengths will not  
137 contribute more than others [13]. In fact they will tend to contribute less, as the statistical power to  
138 distinguish selective effects from drift effects is naturally lower in populations where drift is larger.

139 Second, the previous analysis was performed using all breeds at the same time. It is therefore possible  
140 that some of these regions correspond to differentiation between groups of breeds rather than within  
141 groups. To investigate this question, we performed a genome scan for selection between the ancestors of  
142 the seven population groups using the FLK statistic computed on their estimated allele frequencies [10].  
143 We did not include SNP lying in regions detected within groups since selection biases their estimated  
144 ancestral allele frequencies. The population tree was reconstructed using SNP for which we have unam-  
145 biguous ancestral allele information (Figure S9). The tree is decomposed into two main lineages, one  
146 for European breeds and one for Asian and African breeds. The African group exhibits a slightly higher  
147 branch length. We note, however, that this could be due to ascertainment bias of SNP on the SNP array.

148 This led to the identification of 23 new selection signatures (Figure 2 and Table 3), 9 of them being  
149 common to the analysis of [4]. Overall, combining the scans for recent and ancestral selection, we failed  
150 to replicate 12 of the regions in [4].

## 151 Selection Signatures within population groups

152 **Coloration** Many selection signatures are located around genes that have been shown to be involved in  
153 hair, eye or skin color. In particular, several detected regions include candidate genes that are involved in  
154 the development and migration of melanocytes and in pigmentation : EDN3, KIT, KITLG, MC1R and  
155 MITF. For all these genes except MITF, we have quite strong evidence that they are the genes targeted  
156 by selection in the detected region. In the SWA group, EDN3 was included in the detected region for  
157 both FLK and hapFLK, and in both cases it was the closest gene to the highest test value. KIT and  
158 KITLG were both included in a detected region (with relatively few genes) for two different geographical

159 groups, and were very close to the position with the smallest p-value in one of those. MC1R was also in  
160 a detected region for two different groups, NEU and ITA. In the two cases it was not very close to the  
161 maximum of the signal, but we note that the black skin or coat color is an important characteristic of  
162 the two populations that have been found under selection in this region, the Irish Suffolk and Sardinian  
163 Ancestral Black. This observation, together with the fact that MC1R mutations are responsible for coat  
164 color patterns in mammals (*e.g.* in cattle [27]), supports the hypothesis that MC1R is a good candidate  
165 for the signatures we observed.

166 Although not listed in Table 2, SOX10 and ASIP, two other genes implied in pigmentation, also  
167 show some evidence of selection. In the ITA group, the q-value of hapFLK near SOX10 is 6.2% and  
168 almost reaches the significance threshold of 5%. Similarly, the two closest SNP to ASIP (*s66432* and  
169 *s12884*) present suggestive FLK p-values of respectively  $7.5 \cdot 10^{-4}$  and  $6.8 \cdot 10^{-5}$  in the ASI group, and  
170 one (*s12884*) is significantly differentiated between the ancestral groups. All these genes have previously  
171 been reported as being likely selection targets and/or associated to color patterns in different mammalian  
172 species. Finally, we found a signal for selection centered on the BNC2 gene, that has recently been  
173 associated with skin pigmentation in humans [28]. All population groups present at least one selection  
174 signature which is very likely related to one of the above genes, reflecting the widespread importance of  
175 color patterns to define sheep breeds.

176 Inferring a precise history of underlying causal mutations for color patterns in this dataset is hard  
177 for several reasons: the precise phenotypic characterizations of coat color patterns in the Sheep HapMap  
178 breeds are not available; the 50K SNP array used does not offer sufficient density to associate a given  
179 selection signature to a specific set of polymorphisms; finally, from the literature, it appears that coat  
180 color is a complex trait, with high genetic heterogeneity. In particular, mutations in different genes can  
181 give rise to the same phenotype (*e.g.* in horses [29]). Also, within a gene different mutations can give  
182 rise to different phenotypes, *e.g.* mutations in the MC1R gene (also named the extension locus) have been  
183 associated to a large panel of skin or coat colors [27, 30, 31]. Deciphering selection signatures related to  
184 coat color in sheep and in particular identifying the causal variants under selection will require sequencing  
185 these genes for individuals from several breeds with diverging color patterns. This in turn will help to  
186 understand the evolutionary history of the breeds and the effect of selection [32]. To potentially help in  
187 this task, in Table S1 we list, for each “color gene”, the populations that have likely been selected for.

188 **Morphology** Another group of genes that are found within selection signatures have known effects  
189 on body morphology and development. NPR2, HMGA2 and BMP2, pointed out previously [4] are  
190 confirmed as good positional candidates by our study. We also found strong evidence for selection on  
191 WNT5A, ALX4 or EXT2, and two HOX gene clusters (HOXA and HOXC). WNT5A and ALX4 are  
192 two genes involved in the development of the limbs and skeleton. Mutations in WNT5A are causing the  
193 dominant Human Robinow syndrome, characterized by short stature, limb shortening, genital hypoplasia  
194 and craniofacial abnormalities [33]. ALX4 loss of function mutations cause polydactily in the mouse,  
195 through dysregulation of the sonic hedgehog (SHH) signaling factor [34,35]. Moreover, the ALX4 protein  
196 has been shown to bind proteins from the HOXA (HOXA11 and HOXA3) and HOXC (HOXC4 and  
197 HOXC5) clusters [36]. Located just besides ALX4 and corresponding to the same selection signature,  
198 EXT2 is responsible for the development of exostose in the mouse [37]. *HOX* genes are responsible for  
199 antero-posterior development and skeletal morphology along the anterior-posterior axis in vertebrates.  
200 The selection signature around HOXA is a recent selection signature in the SWA group, while that around  
201 HOXC is an ancestral signature with a high differentiation of the ASI ancestor compared to AFR and  
202 SWA (Table 3).

203 Finally, we note that an ancestral selection signature is found near the ACAN gene, whose expression  
204 was shown to be upregulated by BMP2 [38], another candidate gene for selection. Three genes within  
205 the selection signature are found closer to the maximum test value than ACAN, but these are in silico  
206 predicted genes, whose protein coding function has not been confirmed, so ACAN seems to be overall a  
207 better candidate for explaining selection in the region. Mutations in the ACAN gene have been shown  
208 to induce osteochondrosis [39] and skeletal dysplasia [40]. The ACAN region has also been shown to be  
209 associated with height in humans [41].

210 **Traits of agronomic importance** Sheeps have been raised for meat, milk and wool production.  
211 Under selection signatures, we found several genes associated with these production traits. In addition  
212 to the selection signature in Texels on the MSTN gene for increased muscularity [42], discussed in [13],  
213 we detected a selection signature centered on HDAC9 and including few other genes, which could also be  
214 linked to muscling. HDAC9 is a known transcriptional repressor of myogenesis. Its expression has been  
215 shown to be affected by the callypige mutation in the sheep at the DLK1-DIO3 locus [43]. The signature  
216 around HDAC9 corresponds to a selection signature in the Garut breed from Indonesia, a breed used



217 in ram fights. As already discussed, one selection signature contains ABCG2, a gene underlying a QTL  
218 with large effects on milk production (yield and composition) in cattle [20]. Also, one of the ancestral  
219 selection signatures reaches its maximum value close to the INSIG2 gene, recently shown to be associated  
220 with milk fatty acid composition in Holstein cattle [44]. Two selection signatures could be related to wool  
221 characteristics, one in the CEU group including the FGF5 gene, partly responsible for hair type in the  
222 domestic dog [45,46], and an ancestral selection signature on chromosome 25 in a QTL region associated  
223 to wool quality traits in the sheep [47,48].

224 One of the strong outlying regions in the selection scan contains the PITX3 gene. Further analysis  
225 revealed that this signature was due to the German Texel population haplotype diversity differing from  
226 the other Texel samples (results not shown). It turns out that the German Texel sample consisted of  
227 a case/control study for microphthalmia [7], although the case/control status information in this sample  
228 is not given in the Sheep HapMap dataset. The consequence of such a recruitment is to bias haplotype  
229 frequencies in the region associated with the disease, which provokes a very strong differentiation signal  
230 between the German Texel and the other Texel populations. Although not related to artificial or natural  
231 selection in sheep, this signature illustrates that our method for detecting selection has the potential to  
232 identify causal variants in case/control studies, while using haplotype information.

### 233 **Ancestral signatures of selection**

234 It is difficult to estimate how far back in time signatures of selection found in the ancestral tree took place.  
235 In particular, it would be interesting to place the divergences shown by the ancestral population tree with  
236 respect to sheep domestication. Two interesting candidate genes for ancestral selection signatures might  
237 indicate that the selection signatures captured could be rather old. First, we found selection near the  
238 TRPM8 gene, which has been shown to be a major determinant of cold perception in the mouse [49].  
239 The pattern of allele frequency at the significant SNP (Table 3) is consistent with the climate in the  
240 geographical origins of the population groups. AFR, ASI and ITA, living in warm climates, have low  
241 frequency (0.04-0.16) of the A allele, while NEU and CEU, from colder regions, have higher frequencies  
242 (0.55-0.7), the SWE group having an intermediate frequency of 0.38. Overall, this selection signature  
243 might be due to an adaptation to cold climate through selection on a TRPM8 variant. Another selection  
244 signature lies close to a potential chicken domestication gene, TSHR [50], whose signaling regulates  
245 photoperiodic control of reproduction [51]. This selection signature was identified before [4] and our

246 analysis indicates that selection happened before the divergence of breeds within geographic groups,  
247 consistent with an early selection event. Given its role, we can speculate that selection on the TSHR  
248 gene is related to seasonality of reproduction. Under temperate climates, sheep experience a reproductive  
249 cycle under photoperiodic control. Furthermore, there is evidence that this control was altered during  
250 domestication [52] so our analysis suggests genetic mutations in TSHR may have contributed to this  
251 alteration.

252 As discussed above, some of the genes found underlying ancestral selection signatures can be related  
253 to production or morphological traits (*e.g.* ASIP, INSIG2, ACAN, wool QTL), indicating that these traits  
254 have likely been important at the beginning of sheep history. The other genes that we could identify  
255 as likely selection targets in the ancestral population tree relate to immune response (GATA3) and in  
256 particular to antiviral response (TMEM154 [53], TRAF3 [54]). The most significant ancestral selection  
257 signature is centered around the NF1 gene, encoding neurofibromin. This gene is a negative regulator  
258 of the ras signal transduction pathway, therefore involved in cell proliferation and cancer, in particular  
259 neurofibromatosis. Due to this central role in intra-cellular signaling, mutations affecting this gene can  
260 have many phenotypic consequences so that its potential role in the adaptation of sheep breeds remains  
261 unclear.

## 262 Conclusions

263 The Sheep HapMap dataset is an exceptional resource for sheep genetics studies. In a population genomics  
264 context, our study shows that the rich information contained in these data permits to start unraveling the  
265 genetic history of sheep populations worldwide. In order to fully exploit this information, we used recent  
266 statistical approaches that account for the relationship between populations and the linkage disequilibrium  
267 patterns (haplotype diversity). This allowed detecting with confidence more selection signatures and  
268 identifying for most of them the selected populations. Among these new selection signatures detected  
269 by our study, several result from recent selection and include good positional candidate genes with  
270 functions related to pigmentation (KITLG, EDN3), morphology (WNT5A, ALX4, EXT2, HOXA cluster)  
271 or production traits (HDAC9). Two ancestral selection signatures are also of particular interest as they  
272 harbor genes (TRPM8 and TSHR) whose functions (cold and photoperiodic perception respectively) seem  
273 highly relevant to the selection response during the early history of domestic sheep.

274 With information on adaptive genome regions and selected populations, we hope that our work will  
275 foster new studies to unravel the underlying biological mechanisms involved. To this aim, it is likely that  
276 further phenotypic and genetic data are required. On the genetics side, even though the SNP array used  
277 in this study was sufficient to localize genome regions harboring adaptive mutations, its density and the  
278 SNP ascertainment bias resulting from its design did not allow to tag the causative mutation precisely.  
279 Elucidating the causal variation underlying selection signatures will thus most likely require large scale  
280 sequencing data.

281 Genome scans for selection, including this one, are identifying regions that are outliers from a statis-  
282 tical model and do not require to specify an alternative hypothesis based on phenotypic records. While  
283 this can be seen as an advantage for the initial localization of genome regions, it is a limitation for the  
284 identification of biological processes involved. Gathering phenotypic records in specific populations, in  
285 particular for color and morphology traits, will be needed to go further.

## 286 **Methods**

287 **Selecting populations and animals** Seventy-four breeds are represented in the Sheep HapMap data  
288 set, but we only used a subset of these breeds in our genome scan. We removed the breeds with small  
289 sample size ( $< 20$  animals), for which haplotype diversity cannot be determined with sufficient precision.  
290 Based on historical information, we also removed all breeds resulting from a recent admixture or having  
291 experienced a severe recent bottleneck. Focusing on the remaining breeds, we then studied the genetic  
292 structure within each population group, in order to detect further admixture events. We performed a  
293 standardized PCA of individual based genotype data and applied the admixture software [16].

294 In two population groups (AFR and NEU) the different breeds were clearly separated into distinct  
295 clusters of the PCA and showed no evidence of recent admixture (Figures S1 and S2). These samples  
296 were left unchanged for the genome scan for selection. A similar pattern was observed in three other  
297 groups (ITA, SWA, ASI), except for a few outlier animals that had to be re-attributed to a different breed  
298 or simply removed (Figures S3, S4 and S5). In the two last groups (CEU and SWE), several admixed  
299 breeds were found and were consequently removed from the genome scan analysis (Figures S6 and S7).

300 We performed a genome scan within each group of populations listed in Table 1, with a single SNP  
301 statistic FLK [10] and its haplotype version hapFLK [13].

302 **Population trees** Both statistics require estimating the population tree, with a procedure described in  
303 details in [10]. Briefly, we built a population tree for each group by first calculating Reynolds' distances  
304 between each population pair, and then applying the Neighbor Joining algorithm on the distance matrix.  
305 For each group, we rooted the tree using the Soay sheep as an outgroup. This breed has been isolated on  
306 an Island for many generations and exhibits a very strong differentiation with all the breeds of the Sheep  
307 HapMap dataset, making it well suited to be used as an outgroup.

308 **FLK and hapFLK genome scans** The FLK statistic was computed for each SNP within each group.  
309 The evolutionary model underlying the FLK statistic assumes that SNP were already polymorphic in  
310 the ancestral population. To consider only loci that most likely match this hypothesis, we restricted our  
311 analysis within each group to SNP for which estimated ancestral minor allele frequency  $p_0$  was above 5%.  
312 Under neutrality, the FLK statistic should follow a  $\chi^2$  distribution with  $n - 1$  degrees of freedom (DF),  
313 where  $n$  is the number of populations in the group. Overall, the fit of the theoretical distribution to the  
314 observed distribution was very good (supporting information Text S1) with the mean of the observed  
315 distribution ( $\overline{FLK}$ ) being very close to  $n - 1$  (Table S3). Using  $\overline{FLK}$  as DF for the  $\chi^2$  distribution  
316 provided a better fit to the observed data than the  $n - 1$  theoretical value. We thus computed FLK  
317 p-values using the  $\chi^2(\overline{FLK})$  distribution. To compute the hapFLK statistic, we used of the Scheet and  
318 Stephens LD model [55], a mixture model for haplotypes which requires specifying a number of haplotype  
319 clusters to be used. To choose this number, for each group, we used the fastPHASE cross-validation based  
320 estimation of the optimal number of clusters. The results of this estimation are given in Table S2. The  
321 LD model was estimated on unphased genotype data. The hapFLK statistic is computed as an average  
322 over 20 runs of the EM algorithm to fit the LD model. As in [13], we found that the hapFLK distribution  
323 could be modeled relatively well with a normal distribution (corresponding to non outlying regions) and  
324 a few outliers; we used robust estimation of the mean and standard deviation of the hapFLK statistic  
325 to eliminate the influence of outlying (*i.e.* potentially selected) regions. This procedure was done within  
326 each group, the resulting mean and standard deviation values obtained are given in Table S2. Finally,  
327 we computed at each SNP a p-value for the null hypothesis from the normal distribution.

328 **Selection in ancestral groups** The within-group FLK analysis provides for each SNP an estimation  
329 of the allele frequency  $p_0$  in the population ancestral to all populations of the group. We used this  
330 information to test SNP for selection using between group differentiation, with some adjustments. First,

331 the FLK model assumes tested polymorphisms are present in the ancestral population. SNP for which the  
332 alternate allele has been seen in only one population group are likely to have appeared after divergence  
333 (within the ancestral tree) and were therefore removed from the analysis. Second, regions selected within  
334 groups affect allele frequency in some breeds and therefore bias our estimation of the ancestral allele  
335 frequency in this group. We therefore removed all SNP that were included in within-group selection  
336 signatures. Finally, the FLK test requires a rooted population tree. For the within group analysis, we  
337 could use a very distant population to the current breeds (the Soay sheep). For the ancestral tree, we  
338 created an outgroup homozygous for ancestral alleles at all SNP.

339 **Identifying selected regions and candidate genes** We defined significant regions for each statis-  
340 tic and within each group of populations. Using the neutral distribution ( $\chi^2$  for FLK and Normal for  
341 hapFLK), we computed the p-value of each statistic at each SNP. To identify selected regions, we esti-  
342 mated their q-value [56] to control the FDR. For FLK, SNP with a q-value below 0.1 were considered  
343 significant, which by definition implies that we expect 10% of false positives among our detected SNP.  
344 Since the power of hapFLK is greater than that of FLK [13], we used a q-value threshold of 0.05, there-  
345 fore controlling FDR at the 5% level. For the FLK analysis in ancestral populations, we used an FDR  
346 threshold of 5%.

347 We then aimed at identifying genes that seem good candidates for explaining selection signatures.  
348 We proceeded differently for the single SNP FLK and hapFLK. For FLK, we considered that significant  
349 SNP less than 500Kb apart were capturing the same selection signal. Then, we considered as potential  
350 candidate genes any gene that lies less than 1Mb of any significant SNP. For hapFLK, the genome signal  
351 is much more continuous than single SNP tests, because the statistic captures multipoint LD with the  
352 selected mutations. A consequence is that the significant regions can span large chromosome intervals.  
353 To restrict the list of potential candidate genes, and target only the ones closest to the most significant  
354 SNP, we restricted our search to the part of the signal where the difference in hapFLK value with the  
355 most significant SNP was less than  $0.5\sigma$ . This allowed taking into consideration the profile of the hapFLK  
356 signal, *i.e.* if the profile resembles a plateau, the candidate region will be rather broad while very sharp  
357 hapFLK peaks will provide a narrower candidate region. We extracted all protein coding genes present in  
358 the significant regions using the Ensembl Biomart tool (<http://www.ensembl.org/biomart/>) for Ovis  
359 Aries 3.1 genome assembly. These full lists are provided as Supplementary data (Supporting Dataset 1

360 and Supporting Dataset 2). Within each candidate region, genes were ranked according to their distance  
361 from the most significant position of the region (the larger the rank, the larger the distance). The  
362 functional candidate genes shown in Table 2 and discussed in the manuscript were chosen based on this  
363 rank and / or on their implication in previous association or sweep detection studies.

## 364 Acknowledgments

365 Data analyses were performed on the computer cluster of the bioinformatics platform Toulouse Midi-  
366 Pyrenees. We would like to thank Wendy Brand-Williams for her careful reading of the manuscript.

367 The members of the International Sheep Genomics Consortium who contributed samples and expertise  
368 towards the design and execution of ovine SNP50k genotyping and next generation sequencing, and/or  
369 coauthors of [4] include: Juan Jose Arranz, Universidad de Leon; Georgios Banos, Aristotle University of  
370 Thessaloniki; William Barendse, CSIRO Livestock Industries; Ahmedn El Beltagy, Animal Production  
371 Research Institute; Jorn Benenwitz, University of Hohenheim; Steven Bishop, The Roslin Institute; Si-  
372 mon Boitard, INRA; Lutz Bunger, Scottish Agricultural College; Jorge Calvo, CITA; Antonello Carta,  
373 Agris Sardegna; Ibrahim Cemal, Adnan Menderes University; Elena Ciani, University of Bari; Noelle  
374 Cockett, University of Utah; Dave Coltman, University of Alberta; Brian Dalrymple, CSIRO Livestock  
375 Industries; Mariasilvia DAndrea, Universit degli Studi del Molise; Ottmar Distl, University of Veteri-  
376 nary Medicine Hannover; Cord Drogemuller, Institute of Genetics, University of Berne; Georg Erhardt,  
377 Institut fr Tierzucht und Haustiergenetik Justus-Liebig-Universitt Gieen; Emma Eythorsdottir, Agricul-  
378 tural University of Iceland; Kimberly Gietzen, Illumina Inc.; Clare Gill, Texas A& M University; Elisha  
379 Gootwine, The Volcani Center; Vidya Gupta, National Chemical Laboratory; Olivier Hanotte, University  
380 of Nottingham; Ben Hayes, Department of Primary Industries Victoria; Michael Heaton, USDA MARC;  
381 Stefan Hiendleder, University of Adelaide; Han Jialin, ILRI and CAAS; Juha Kantanen, MTT Agrifood  
382 Research; Matthew Kent, CiGene; James Kijas, CSIRO Livestock Industries; Denis Larkin, University  
383 of Aberystwyth; Johannes A. Lenstra, Utrecht University; Kui Li, Lhasa People Hospital, Tibet; Terry  
384 Longhurst, Meat and Livestock Australia; Runlin Ma, Chinese Academy of Science; Russell McCulloch,  
385 CSIRO Livestock Industries; David MacHugh, University College Dublin; Sean McWilliam, CSIRO Live-  
386 stock Industries; John McEwan, AgResearch; Jillian Maddox, University of Melbourne; Massoud Malek,  
387 IAEA; Faruque Mdomar, Bangladesh Agriculture University; Despoina Miltiadou, Cyprus University of

388 Technology; Luis V. Monteagudo Ibez, Universidad de Zaragoza; Carole Moreno, INRA; Frank Nicholas,  
389 University of Sydney; Kristen Nowak, University of Western Australia; V. Hutton Oddy, University of  
390 New England; Samuel Paiva, Embrapa; Varsha Pardeshi, National Chemical Laboratory; Josephine Pem-  
391 berton, University of Edinburgh; Fabio Pilla, Universit degli Studi del Molise; Laercio R. Porto Neto,  
392 CSIRO Livestock Industries; Herman Raadsma, University of Sydney; Cyril Roberts, Caribbean Agricul-  
393 tural Research and Development Institute; Magali San Cristobal, INRA; Tiziana Sechi, Agris Sardegna;  
394 Paul Scheet, University of Texas M. D. Anderson Cancer Center; Bertrand Servin, INRA; Mohammad  
395 Shariflou, University of Sydney; Pradeepa Silva, University of Peradeniya; Henner Simianer, University  
396 of Goettingen; Jon Slate, University of Sheffield; Mikka Tapio, MTT; and Selina Vattathil, University of  
397 Texas M. D. Anderson Cancer Center; Vicki Whan, CSIRO Livestock Industries.

## 398 References

- 399 1. Andersson L (2012) How selective sweeps in domestic animals provide new insight into biological  
400 mechanisms. *J Intern Med* 271: 1-14.
- 401 2. Zeder MA (2008) Domestication and early agriculture in the mediterranean basin: Origins, diffu-  
402 sion, and impact. *Proceedings of the National Academy of Sciences* 105: 11597-11604.
- 403 3. Kijas JW, Townley D, Dalrymple BP, Heaton MP, Maddox JF, et al. (2009) A genome wide survey  
404 of SNP variation reveals the genetic structure of sheep breeds. *PLoS One* 4: e4668.
- 405 4. Kijas JW, Lenstra JA, Hayes B, Boitard S, Porto Neto LR, et al. (2012) Genome-wide analysis of  
406 the world's sheep breeds reveals high levels of historic mixture and strong recent selection. *PLoS*  
407 *Biol* 10: e1001258.
- 408 5. Garcia-Gómez E, Reverter A, Whan V, McWilliam SM, Arranz JJA, et al. (2011) Using regulatory  
409 and epistatic networks to extend the findings of a genome scan: identifying the gene drivers of  
410 pigmentation in merino sheep. *PLoS ONE* 6: e21158.
- 411 6. Moradi MH, Nejati-Javaremi A, Moradi-Shahrbabak M, Dodds KG, McEwan JC (2012) Genomic  
412 scan of selective sweeps in thin and fat tail sheep breeds for identifying of candidate regions asso-  
413 ciated with fat deposition. *BMC Genet* 13: 10.

- 414 7. Becker D, Tetens J, Brunner A, Burstel D, Ganter M, et al. (2010) Microphthalmia in Texel sheep  
415 is associated with a missense mutation in the paired-like homeodomain 3 (PITX3) gene. PLoS One  
416 5: e8689.
- 417 8. Zhang L, Mousel MR, Wu X, Michal JJ, Zhou X, et al. (2013) Genome-Wide Genetic Diversity  
418 and Differentially Selected Regions among Suffolk, Rambouillet, Columbia, Polypay, and Targhee  
419 Sheep. PLoS One 8: e65942.
- 420 9. Excoffier L, Hofer T, Foll M (2009) Detecting loci under selection in a hierarchically structured  
421 population. Heredity (Edinb) 103: 285-98.
- 422 10. Bonhomme M, Chevalet C, Servin B, Boitard S, Abdallah J, et al. (2010) Detecting selection in  
423 population trees: the Lewontin and Krakauer test extended. Genetics 186: 241-62.
- 424 11. Bierne N, Roze D, Welch JJ (2013) Pervasive selection or is it? why are fst outliers sometimes so  
425 frequent? Molecular Ecology 22: 2061–2064.
- 426 12. Gnther T, Coop G (2013) Robust identification of local adaptation from allele frequencies. Genetics  
427 195: 205-220.
- 428 13. Fariello MI, Boitard S, Naya H, SanCristobal M, Servin B (2013) Detecting signatures of selection  
429 through haplotype differentiation among hierarchically structured populations. Genetics 193: 929-  
430 41.
- 431 14. Lewontin RC, Krakauer J (1973) Distribution of gene frequency as a test of the theory of the  
432 selective neutrality of polymorphisms. Genetics 74: 175–195.
- 433 15. Pritchard JK, Stephens M, Donnelly P (2000) Inference of population structure using multilocus  
434 genotype data. Genetics 155: 945-59.
- 435 16. Alexander DH, Novembre J, Lange K (2009) Fast model-based estimation of ancestry in unrelated  
436 individuals. Genome Res 19: 1655-64.
- 437 17. Johnston SE, McEwan JC, Pickering NK, Kijas JW, Beraldi D, et al. (2011) Genome-wide associ-  
438 ation mapping identifies the genetic basis of discrete and quantitative variation in sexual weaponry  
439 in a wild sheep population. Mol Ecol 20: 2555-66.



- 440 18. Dominik S, Henshall JM, Hayes BJ (2012) A single nucleotide polymorphism on chromosome 10 is  
441 highly predictive for the polled phenotype in Australian Merino sheep. *Anim Genet* 43: 468-70.
- 442 19. Akey JM, Ruhe AL, Akey DT, Wong AK, Connelly CF, et al. (2010) Tracking footprints of artificial  
443 selection in the dog genome. *Proc Natl Acad Sci U S A* 107: 1160-5.
- 444 20. Cohen-Zinder M, Seroussi E, Larkin DM, Looor JJ, Everts-van der Wind A, et al. (2005) Identifi-  
445 cation of a missense mutation in the bovine ABCG2 gene with a major effect on the QTL on  
446 chromosome 6 affecting milk yield and composition in Holstein cattle. *Genome Res* 15: 936-44.
- 447 21. Eberlein A, Takasuga A, Setoguchi K, Pfuhl R, Flisikowski K, et al. (2009) Dissection of genetic  
448 factors modulating fetal growth in cattle indicates a substantial role of the non-smc condensin i  
449 complex, subunit g (ncapg) gene. *Genetics* 183: 951-964.
- 450 22. Bongiorno S, Mancini G, Chillemi G, Pariset L, Valentini A (2012) Identification of a short region  
451 on chromosome 6 affecting direct calving ease in piedmontese cattle breed. *PLoS ONE* 7: e50137.
- 452 23. Mancini G, Gargani M, Chillemi G, Nicolazzi EL, Marsan PA, et al. (2014) Signatures of selection  
453 in five Italian cattle breeds detected by a 54K SNP panel. *Mol Biol Rep* 41: 957-65.
- 454 24. Rothhammer S, Seichter D, Forster M, Medugorac I (2013) A genome-wide scan for signatures of  
455 differential artificial selection in ten cattle breeds. *BMC Genomics* 14: 908.
- 456 25. Pintus E, Sorbolini S, Albera A, Gaspa G, Dimauro C, et al. (2013) Use of locally weighted  
457 scatterplot smoothing (LOWESS) regression to study selection signatures in Piedmontese and  
458 Italian Brown cattle breeds. *Anim Genet* .
- 459 26. Druet T, Perez-Pardal L, Charlier C, Gautier M (2013) Identification of large selective sweeps  
460 associated with major genes in cattle. *Anim Genet* 44: 758-62.
- 461 27. Klungland H, Våge DI, Gomez-Raya L, Adalsteinsson S, Lien S (1995) The role of melanocyte-  
462 stimulating hormone (MSH) receptor in bovine coat color determination. *Mammalian genome* 6:  
463 636-9.
- 464 28. Jacobs LC, Wollstein A, Lao O, Hofman A, Klaver CC, et al. (2013) Comprehensive candidate  
465 gene study highlights UGT1A and BNC2 as new genes determining continuous skin color variation  
466 in Europeans. *Hum Genet* 132: 147-58.

- 467 29. Hauswirth R, Haase B, Blatter M, Brooks Sa, Burger D, et al. (2012) Mutations in MITF and  
468 PAX3 cause "splashed white" and other white spotting phenotypes in horses. *PLoS genetics* 8:  
469 e1002653.
- 470 30. Lin JY, Fisher DE (2007) Melanocyte biology and skin pigmentation. *Nature* 445: 843–50.
- 471 31. Joerg H, Fries HR, Meijerink E, Stranzinger GF (1996) Red coat color in Holstein cattle is associ-  
472 ated with a deletion in the MSHR gene. *Mammalian genome* 7: 317–8.
- 473 32. Linnen CR, Poh YP, Peterson BK, Barrett RDH, Larson JG, et al. (2013) Adaptive evolution of  
474 multiple traits through multiple mutations at a single gene. *Science* 339: 1312–6.
- 475 33. Person AD, Beiraghi S, Sieben CM, Hermanson S, Neumann AN, et al. (2010) WNT5A mutations  
476 in patients with autosomal dominant Robinow syndrome. *Developmental dynamics* 239: 327–37.
- 477 34. Kuijper S, Feitsma H, Sheth R, Korving J, Reijnen M, et al. (2005) Function and regulation of  
478 Alx4 in limb development: complex genetic interactions with Gli3 and Shh. *Developmental biology*  
479 285: 533–44.
- 480 35. Qu S, Tucker SC, Ehrlich JS, Levorse JM, Flaherty LA, et al. (1998) Mutations in mouse *Aristaless-*  
481 *like4* cause Strong's luxoid polydactyly. *Development* 125: 2711-21.
- 482 36. Ravasi T, Suzuki H, Cannistraci CV, Katayama S, Bajic VB, et al. (2010) An atlas of combinatorial  
483 transcriptional regulation in mouse and man. *Cell* 140: 744 - 752.
- 484 37. Stickens D, Zak BM, Rougier N, Esko JD, Werb Z (2005) Mice deficient in *Ext2* lack heparan  
485 sulfate and develop exostoses. *Development* 132: 5055–68.
- 486 38. Noguchi Ki, Watanabe Y, Fuse T, Takizawa M (2010) A new chondrogenic differentiation initiator  
487 with the ability to up-regulate sox trio expression. *Journal of Pharmacological Sciences* 112: 89-97.
- 488 39. Stattin EL, Wiklund F, Lindblom K, Onnerfjord P, Jonsson BA, et al. (2010) A missense mutation  
489 in the aggrecan C-type lectin domain disrupts extracellular matrix interactions and causes dominant  
490 familial osteochondritis dissecans. *American journal of human genetics* 86: 126–37.
- 491 40. Thompson SW, Merriman B, Funari Va, Fresquet M, Lachman RS, et al. (2009) A recessive skeletal  
492 dysplasia, SEMD aggrecan type, results from a missense mutation affecting the C-type lectin  
493 domain of aggrecan. *American journal of human genetics* 84: 72–9.

- 494 41. Weedon MN, Lango H, Lindgren CM, Wallace C, Evans DM, et al. (2008) Genome-wide association  
495 analysis identifies 20 loci that influence adult height. *Nature genetics* 40: 575–83.
- 496 42. Clop A, Marcq F, Takeda H, Pirottin D, Tordoir X, et al. (2006) A mutation creating a potential  
497 illegitimate microRNA target site in the myostatin gene affects muscularity in sheep. *Nat Genet*  
498 38: 813-8.
- 499 43. Fleming-Waddell JN, Olbricht GR, Taxis TM, White JD, Vuocolo T, et al. (2009) Effect of DLK1  
500 and RTL1 but not MEG3 or MEG8 on muscle gene expression in Callipyge lambs. *PloS one* 4:  
501 e7399.
- 502 44. Rincon G, Islas-Trejo A, Castillo AR, Bauman DE, German BJ, et al. (2012) Polymorphisms in  
503 genes in the SREBP1 signalling pathway and SCD are associated with milk fatty acid composition  
504 in Holstein cattle. *J Dairy Res* 79: 66-75.
- 505 45. Housley DJE, Venta PJ (2006) The long and the short of it: evidence that *fgf5* is a major deter-  
506 minant of canine hair-itability. *Animal Genetics* 37: 309–315.
- 507 46. Cadieu E, Neff MW, Quignon P, Walsh K, Chase K, et al. (2009) Coat variation in the domestic  
508 dog is governed by variants in three genes. *Science* 326: 150-3.
- 509 47. Ponz R, Moreno C, Allain D, Elsen JM, Lantier F, et al. (2001) Assessment of genetic variation  
510 explained by markers for wool traits in sheep via a segment mapping approach. *Mamm Genome*  
511 12: 569-72.
- 512 48. Bidinost F, Roldan D, Doderio A, Cano E, Taddeo H, et al. (2007) Wool quantitative trait loci in  
513 merino sheep. *Small Ruminant Research* 74: 113 - 118.
- 514 49. Bautista DM, Siemens J, Glazer JM, Tsuruda PR, Basbaum AI, et al. (2007) The menthol receptor  
515 TRPM8 is the principal detector of environmental cold. *Nature* 448: 204–8.
- 516 50. Rubin CJ, Zody MC, Eriksson J, Meadows JRS, Sherwood E, et al. (2010) Whole-genome resequencing reveals loci under selection during chicken domestication. *Nature* 464: 587–91.
- 517  
518 51. Nakao N, Ono H, Yamamura T, Anraku T, Takagi T, et al. (2008) Thyrotrophin in the pars  
519 tuberalis triggers photoperiodic response. *Nature* 452: 317-22.

- 520 52. Balasse M, Tresset A (2007) Environmental constraints on the reproductive activity of domestic  
521 sheep and cattle : what latitude for the herder ? *Anthropozoologica* 42: 71–88.
- 522 53. Heaton MP, Clawson ML, Chitko-Mckown CG, Leymaster Ka, Smith TPL, et al. (2012) Reduced  
523 lentivirus susceptibility in sheep with TMEM154 mutations. *PLoS genetics* 8: e1002467.
- 524 54. Oganessian G, Saha SK, Guo B, He JQ, Shahangian A, et al. (2006) Critical role of TRAF3 in the  
525 Toll-like receptor-dependent and -independent antiviral response. *Nature* 439: 208–11.
- 526 55. Scheet P, Stephens M (2006) A fast and flexible statistical model for large-scale population genotype  
527 data: applications to inferring missing genotypes and haplotypic phase. *Am J Hum Genet* 78: 629-  
528 44.
- 529 56. Storey JD, Tibshirani R (2003) Statistical significance for genomewide studies. *Proc Natl Acad*  
530 *Sci U S A* 100: 9440-5.

## 531 **Figures Legends**

**Figure 1.** Localization of selection signatures identified in 7 groups of populations. Candidate genes are indicated above their genomic localization. Only chromosomes harboring selection signatures are plotted.

**Figure 2.** Genome scan for selection signature in ancestral populations of the geographical groups. Significant SNP at the 5% FDR level are plotted in darker color.

532 **Tables**

**Table 1. Population groups from the Sheep HapMap dataset used for the detection of selection signatures**

| Group             | Abbreviation | Size | Populations (Abbreviations)                                                                                                                                     |
|-------------------|--------------|------|-----------------------------------------------------------------------------------------------------------------------------------------------------------------|
| Africa            | AFR          | 2    | Red Maasai (RMA)<br>Ethiopian Menz (EMZ)                                                                                                                        |
| Asia              | ASI          | 8    | Bangladeshi BGE (BGE)<br>Bangladeshi Garole (BGA)<br>Changthangi (CHA)<br>Deccani (IDC)<br>Garut (GUR)<br>Indian Garole (GAR)<br>Sumatra (SUM)<br>Tibetan (TIB) |
| Central Europe    | CEU          | 4    | Bundner Oberlander (BOS)<br>Engadine Red (ERS)<br>Valais Blacknose (VBS)<br>Valais Red (VRS)                                                                    |
| Italy             | ITA          | 4    | Altamura (ALT)<br>Comisana (COM)<br>Leccese (LEC)<br>Sardinian Ancestral Black (SAB)                                                                            |
| Northern Europe   | NEU          | 6    | Galway (GAL)<br>German (GTX), New Zealand (NTX) and Scottish (STX) Texel<br>Irish Suffolk (ISF)<br>New Zealand Romney (NZR)                                     |
| South West Asia   | SWA          | 4    | Afshari (AFS)<br>Moghani (MOG)<br>Norduz (NDZ)<br>Qezel (QEZ)                                                                                                   |
| South West Europe | SWE          | 4    | Australian Merino (MER)<br>Churra (CHU)<br>Meat (LAM) and Milk (LAC) Lacaune                                                                                    |

**Table 2. Selection signatures in the 7 geographical groups.** Regions identified with the hapFLK or FLK test, with the corresponding population group and most differentiated populations (except for the AFR group). Full names of groups and populations are given in Table 1. The number of genes included in each region and the rank of candidate genes within the region is also provided. Overlapping regions in different groups or with different tests are grouped by background color. †: signatures of selection previously identified [4]. ‡: this outlying region is not due to evolutionary processes (see details in the main text).

| OAR | Begin<br>(Mbp) | End<br>(Mbp) | P-value | Q-value | Group | Test   | Diff.<br>pop.  | Cand.<br>gene | Nb.<br>genes | Rank |
|-----|----------------|--------------|---------|---------|-------|--------|----------------|---------------|--------------|------|
| 2   | 46.65          | 57.99        | 6.3e-10 | 7.1e-07 | ITA   | hapFLK | COM            | NPR2†         | 85           | 15   |
| 2   | 51.41          | 53.44        | 4.1e-09 | 1.6e-04 | ITA   | FLK    | COM            |               | 41           | 2    |
| 2   | 74.00          | 74.86        | 7.4e-04 | 3.7e-02 | ITA   | hapFLK | COM            |               | 7            |      |
| 2   | 81.27          | 87.32        | 4.1e-09 | 2.3e-06 | ITA   | hapFLK | COM            | BNC2          | 18           | 1    |
| 2   | 110.08         | 112.08       | 1.5e-05 | 6.7e-02 | ASI   | FLK    | SUM TIB<br>GUR |               | 11           |      |
| 2   | 113.36         | 122.24       | 7.0e-06 | 3.3e-03 | NEU   | hapFLK | GTX<br>NTX STX | MSTN†         | 42           | 8    |
| 2   | 239.76         | 241.76       | 2.9e-05 | 9.3e-02 | SWA   | FLK    | AFS            | RUNX3         | 33           | 1    |
| 3   | 84.40          | 86.40        | 2.5e-05 | 9.1e-02 | ASI   | FLK    |                |               | 15           |      |
| 3   | 120.91         | 125.49       | 5.3e-04 | 3.0e-02 | ITA   | hapFLK | COM            | KITLG         | 5            | 5    |
| 3   | 122.07         | 130.85       | 6.8e-08 | 4.2e-04 | AFR   | hapFLK |                |               | 25           | 1    |
| 3   | 151.42         | 156.93       | 3.3e-16 | 3.1e-12 | ITA   | hapFLK | COM<br>SAB     | HMGA2†        | 26           | 1    |
| 3   | 154.79         | 154.93       | 5.9e-04 | 4.3e-02 | AFR   | hapFLK |                |               | 12           | 12   |
| 3   | 159.64         | 161.60       | 6.1e-04 | 3.3e-02 | ITA   | hapFLK | COM            |               | 6            |      |
| 3   | 167.85         | 171.67       | 1.5e-04 | 1.3e-02 | ITA   | hapFLK | COM<br>ALT SAB |               | 27           |      |
| 4   | 4.61           | 6.61         | 5.3e-06 | 2.1e-02 | SWA   | FLK    | MOG            |               | 8            |      |
| 4   | 8.50           | 19.66        | 4.2e-06 | 1.1e-03 | CEU   | hapFLK | VBS VRS        |               | 49           |      |
| 4   | 15.11          | 17.11        | 8.4e-07 | 1.5e-02 | CEU   | FLK    | VBS            |               | 7            |      |
| 4   | 26.46          | 28.46        | 2.4e-05 | 9.1e-02 | ASI   | FLK    | GUR IDC<br>SUM | HDAC9         | 6            | 1    |

Table 2 – continued from previous page

|    |       |       |         |         |     |        |         |                      |    |        |
|----|-------|-------|---------|---------|-----|--------|---------|----------------------|----|--------|
| 4  | 44.49 | 45.76 | 2.7e-04 | 3.4e-02 | NEU | hapFLK | NZR     |                      | 12 |        |
| 4  | 45.57 | 47.57 | 1.8e-06 | 2.4e-02 | ASI | FLK    | SUM     |                      | 8  |        |
| 4  | 67.75 | 69.80 | 3.5e-07 | 2.3e-03 | SWA | FLK    | MOG     | HOXA                 | 18 | 2→10   |
| 5  | 29.40 | 31.40 | 1.1e-05 | 6.7e-02 | ASI | FLK    | GAR     |                      | 3  |        |
| 5  | 47.35 | 49.35 | 1.4e-05 | 6.7e-02 | ASI | FLK    | BGA     |                      | 35 |        |
| 5  | 78.16 | 78.76 | 4.2e-04 | 4.2e-02 | NEU | hapFLK | NZT     |                      | 16 |        |
| 6  | 5.62  | 7.62  | 3.1e-06 | 6.0e-02 | ITA | FLK    | SAB     |                      | 11 |        |
| 6  | 33.22 | 41.02 | 3.4e-08 | 8.0e-05 | SWE | hapFLK | LAC     | ABCG2†/<br>LAM NCAPG | 27 | 2 / 17 |
| 6  | 34.71 | 39.12 | 1.6e-07 | 4.1e-05 | ITA | hapFLK | COM     | ABCG2†/<br>NCAPG     | 23 | 11 / 2 |
| 6  | 35.94 | 38.31 | 2.1e-04 | 1.9e-02 | CEU | hapFLK | VRS VBS | ABCG2†/<br>NCAPG     | 19 | 9 / 17 |
| 6  | 67.98 | 70.36 | 4.3e-06 | 1.1e-03 | CEU | hapFLK | VBS     | KIT†                 | 9  | 5      |
| 6  | 68.90 | 70.95 | 9.6e-07 | 5.3e-03 | SWA | FLK    |         |                      | 10 | 2      |
| 6  | 93.30 | 94.39 | 3.8e-04 | 2.7e-02 | CEU | hapFLK | VRS&VBS | FGF5†                | 8  | 5      |
|    |       |       |         |         |     |        | or      |                      |    |        |
|    |       |       |         |         |     |        | ERS&BOS |                      |    |        |
| 7  | 49.15 | 51.15 | 1.1e-05 | 9.7e-02 | CEU | FLK    | VRS     |                      | 7  |        |
| 7  | 78.31 | 80.31 | 8.1e-07 | 1.5e-02 | CEU | FLK    | VRS ERS |                      | 13 |        |
| 8  | 23.97 | 25.97 | 2.9e-05 | 9.6e-02 | ASI | FLK    | TIB     |                      | 6  |        |
| 9  | 29.46 | 31.55 | 3.7e-04 | 3.4e-02 | SWE | hapFLK | CHU     |                      | 1  |        |
|    |       |       |         |         |     |        | MER     |                      |    |        |
| 9  | 37.79 | 46.03 | 1.9e-05 | 6.2e-03 | NEU | hapFLK | NZT ISF |                      | 6  |        |
| 10 | 24.02 | 34.91 | 1.4e-14 | 1.1e-10 | CEU | hapFLK | BOS ERS | RXFP2†               | 68 | 9      |
|    |       |       |         |         |     |        | VRS     |                      |    |        |
| 10 | 29.42 | 29.71 | 9.6e-04 | 4.4e-02 | ITA | hapFLK | COM     |                      | 14 | 2      |
|    |       |       |         |         |     |        | ALT     |                      |    |        |
| 10 | 28.50 | 30.50 | 6.3e-06 | 7.5e-02 | CEU | FLK    | BOS ERS |                      | 14 | 1      |



Table 2 – continued from previous page

|    |       |       |         |         |     |        |         |               |     |       |
|----|-------|-------|---------|---------|-----|--------|---------|---------------|-----|-------|
| 10 | 28.50 | 30.50 | 3.2e-05 | 9.7e-02 | SWA | FLK    | NDZ     |               | 14  | 1     |
| 10 | 28.50 | 30.50 | 1.3e-06 | 5.4e-02 | SWE | FLK    | MER     |               | 14  | 1     |
| 10 | 48.90 | 49.59 | 5.2e-04 | 3.1e-02 | CEU | hapFLK |         |               | 3   |       |
| 11 | 12.55 | 14.12 | 1.4e-04 | 2.2e-02 | NEU | hapFLK |         |               | 33  |       |
| 11 | 24.18 | 38.74 | 9.8e-09 | 8.0e-05 | SWE | hapFLK | LAC     |               | 296 |       |
|    |       |       |         |         |     |        | MER     |               |     |       |
| 11 | 40.31 | 46.70 | 3.3e-06 | 5.5e-04 | ITA | hapFLK | SAB     |               | 164 |       |
| 12 | 42.66 | 44.66 | 3.4e-07 | 7.6e-03 | ASI | FLK    | SUM     |               | 10  |       |
| 13 | 33.10 | 40.02 | 5.7e-06 | 1.8e-03 | AFR | hapFLK |         |               | 41  |       |
| 13 | 40.60 | 50.30 | 4.9e-07 | 4.9e-04 | AFR | hapFLK |         | BMP2†         | 76  | 1     |
| 13 | 43.34 | 51.28 | 2.7e-07 | 1.7e-04 | SWE | hapFLK | LAC     | PRNP          | 49  | 8     |
|    |       |       |         |         |     |        | LAM     |               |     |       |
| 13 | 56.11 | 57.17 | 2.5e-08 | 4.8e-04 | SWA | hapFLK | MOG     | EDN3          | 19  | 1     |
| 13 | 55.33 | 57.43 | 8.4e-11 | 1.1e-06 | SWA | FLK    | MOG     |               | 19  | 1     |
| 14 | 6.37  | 13.60 | 1.6e-04 | 1.4e-02 | ITA | hapFLK | SAB     |               | 70  |       |
| 14 | 13.64 | 13.70 | 5.3e-04 | 4.9e-02 | NEU | hapFLK | ISF     | MC1R          | 48  | 33    |
| 14 | 13.70 | 16.46 | 1.2e-04 | 1.1e-02 | ITA | hapFLK | SAB     |               | 37  | 21    |
| 14 | 45.49 | 50.09 | 1.6e-04 | 2.5e-02 | NEU | hapFLK | NTX NZR |               | 117 |       |
| 15 | 48.87 | 50.87 | 1.5e-05 | 6.7e-02 | ASI | FLK    | GAR IDC |               | 36  |       |
| 15 | 71.71 | 73.71 | 3.8e-06 | 1.6e-02 | SWA | FLK    | MOG     | ALX4/<br>EXT2 | 13  | 1 / 3 |
| 16 | 33.20 | 35.10 | 1.8e-04 | 1.8e-02 | AFR | hapFLK |         | C6 / C7       | 8   | 5 / 7 |
| 16 | 63.97 | 65.97 | 1.1e-05 | 6.7e-02 | ASI | FLK    | GAR IDC |               | 5   |       |
| 19 | 4.42  | 7.43  | 2.2e-04 | 1.9e-02 | CEU | hapFLK | VRS BOS | GLB1†         | 17  | 14    |
| 19 | 30.42 | 35.09 | 3.2e-05 | 4.2e-03 | CEU | hapFLK | VBS BOS | MITF†         | 14  | 9     |
|    |       |       |         |         |     |        | ERS     |               |     |       |
| 19 | 44.60 | 46.60 | 3.9e-06 | 3.9e-02 | ASI | FLK    | GAR     | WNT5A         | 4   | 1     |
|    |       |       |         |         |     |        | BGA     |               |     |       |

Table 2 – continued from previous page

|    |       |       |         |         |     |        |     |                    |    |       |
|----|-------|-------|---------|---------|-----|--------|-----|--------------------|----|-------|
| 20 | 36.74 | 38.52 | 2.8e-04 | 2.3e-02 | CEU | hapFLK | VRS |                    | 10 |       |
| 22 | 18.90 | 24.36 | 1.5e-11 | 7.4e-08 | NEU | hapFLK | GTX | PITX3 <sup>‡</sup> | 85 | 5     |
| 23 | 42.50 | 46.96 | 2.2e-05 | 5.4e-03 | AFR | hapFLK |     | MC2R/<br>MC5R      | 35 | 1 / 2 |
| 23 | 54.14 | 56.14 | 3.8e-07 | 7.6e-03 | ASI | FLK    | GAR |                    | 5  |       |
| 25 | 0.08  | 3.08  | 3.7e-04 | 2.4e-02 | ITA | hapFLK | SAB |                    | 16 |       |

**Table 3. Selection signatures in ancestral populations.** SNP with significant FLK value at the 5% FDR level, with estimated allele frequencies in all ancestral groups. The number of genes included in each region (1Mb up-or-downstream the position) and the rank of candidate genes within the region is also provided. †: signatures of selection previously identified [4].

| OAR | position  | Estimated ancestral allele frequencies |      |      |      |      |      |      | P-value | Q-value | Cand. gene | Nb. genes | Rank |
|-----|-----------|----------------------------------------|------|------|------|------|------|------|---------|---------|------------|-----------|------|
|     |           | AFR                                    | ASI  | SWA  | NEU  | CEU  | ITA  | SWE  |         |         |            |           |      |
| 1   | 7192190   | 0.15                                   | 0.08 | 0.16 | 0.55 | 0.69 | 0.04 | 0.38 | 1.7e-06 | 5.3e-03 | TRPM8      | 19        | 8    |
| 1   | 237070498 | 0.87                                   | 0.95 | 0.91 | 0.48 | 0.24 | 0.77 | 0.35 | 1.4e-05 | 2.5e-02 | GYG1       | 16        | 5    |
| 1   | 239424807 | 0.46                                   | 0.68 | 0.06 | 0.21 | 0.15 | 0.11 | 0.17 | 3.4e-05 | 4.8e-02 |            | 9         |      |
| 1   | 239491620 | 0.53                                   | 0.41 | 0.94 | 0.86 | 0.93 | 0.93 | 0.88 | 4.3e-05 | 5.6e-02 |            | 9         |      |
| 2   | 45500785  | 0.43                                   | 0.91 | 0.23 | 0.76 | 0.87 | 0.87 | 0.93 | 2.2e-06 | 6.4e-03 | LPL        | 6         | 3    |
| 2   | 182607165 | 0.99                                   | 0.97 | 0.18 | 0.64 | 0.73 | 0.83 | 0.64 | 3.4e-08 | 1.8e-04 | INSIG2     | 10        | 3    |
| 2   | 182672296 | 0.99                                   | 0.94 | 0.32 | 0.90 | 0.86 | 0.89 | 0.81 | 7.7e-07 | 2.8e-03 |            | 10        |      |
| 2   | 192231314 | 0.59                                   | 0.93 | 0.36 | 0.96 | 0.89 | 0.81 | 0.95 | 1.6e-05 | 2.8e-02 |            | 8         |      |
| 3   | 132478420 | 0.24                                   | 0.89 | 0.18 | 0.93 | 0.81 | 0.84 | 0.82 | 1.2e-06 | 3.9e-03 | HOXC †     | 54        | 1→9  |
| 3   | 180860403 | 0.71                                   | 0.53 | 0.28 | 0.82 | 0.31 | 0.12 | 0.13 | 1.7e-05 | 2.8e-02 |            | 22        |      |
| 5   | 15522700  | 0.68                                   | 0.63 | 0.92 | 0.27 | 0.76 | 0.99 | 0.78 | 9.8e-06 | 2.0e-02 |            | 51        |      |
| 7   | 89519883  | 0.63                                   | 0.61 | 0.19 | 0.89 | 0.18 | 0.60 | 0.95 | 6.1e-10 | 5.2e-06 | TSHR †     | 6         | 3    |
| 8   | 31748642  | 0.84                                   | 0.93 | 0.94 | 0.16 | 0.63 | 0.47 | 0.19 | 2.8e-05 | 4.1e-02 | PREP †     | 6         | 1    |
| 11  | 18248852  | 0.35                                   | 0.32 | 0.82 | 0.64 | 0.94 | 0.96 | 0.92 | 1.3e-05 | 2.5e-02 | NF1 †      | 23        | 1    |
| 11  | 18325488  | 0.87                                   | 0.93 | 0.00 | 0.35 | 0.04 | 0.03 | 0.04 | 3.3e-16 | 7.2e-12 |            | 24        | 4    |
| 11  | 18335747  | 0.87                                   | 0.93 | 0.00 | 0.35 | 0.04 | 0.03 | 0.04 | 3.3e-16 | 7.2e-12 |            | 22        | 4    |
| 11  | 18433474  | 0.87                                   | 0.93 | 0.02 | 0.35 | 0.07 | 0.02 | 0.05 | 3.8e-15 | 5.4e-11 |            | 22        | 1    |
| 11  | 18440783  | 0.78                                   | 0.93 | 0.02 | 0.34 | 0.07 | 0.02 | 0.05 | 2.0e-14 | 2.2e-10 |            | 22        | 1    |
| 11  | 25704651  | 0.97                                   | 0.96 | 0.97 | 0.42 | 0.94 | 0.94 | 0.96 | 8.5e-06 | 1.9e-02 |            | 73        |      |
| 11  | 26284826  | 0.99                                   | 0.97 | 0.94 | 0.38 | 0.93 | 0.95 | 0.79 | 3.2e-05 | 4.6e-02 |            | 100       |      |
| 11  | 26571629  | 0.92                                   | 0.94 | 0.98 | 0.29 | 0.89 | 0.88 | 0.86 | 1.8e-05 | 2.8e-02 |            | 115       |      |
| 11  | 26872280  | 0.78                                   | 0.71 | 0.93 | 0.15 | 0.89 | 0.90 | 0.90 | 2.2e-07 | 9.5e-04 |            | 111       |      |
| 13  | 12120674  | 0.29                                   | 0.84 | 0.97 | 0.91 | 0.97 | 0.92 | 0.84 | 7.7e-06 | 1.8e-02 | GATA3      | 6         | 1    |
| 13  | 62857560  | 0.52                                   | 0.62 | 0.65 | 0.98 | 0.67 | 0.92 | 0.36 | 3.6e-06 | 9.7e-03 | ASIP †     | 32        | 12   |
| 15  | 3706790   | 0.71                                   | 0.22 | 0.96 | 0.28 | 0.27 | 0.34 | 0.21 | 6.8e-06 | 1.7e-02 |            | 4         |      |
| 15  | 29856310  | 0.98                                   | 0.99 | 0.99 | 0.47 | 0.92 | 0.95 | 0.96 | 9.8e-06 | 2.0e-02 |            | 35        |      |
| 16  | 38696505  | 0.95                                   | 0.98 | 0.95 | 0.99 | 0.68 | 0.31 | 0.30 | 6.8e-07 | 2.7e-03 | PRLR †     | 18        | 2    |
| 17  | 4867509   | 0.91                                   | 0.95 | 0.85 | 0.54 | 0.18 | 0.58 | 0.17 | 1.8e-05 | 2.8e-02 | TMEM154    | 9         | 1    |
| 18  | 19342316  | 0.90                                   | 0.79 | 0.67 | 0.35 | 0.75 | 0.10 | 0.09 | 1.9e-07 | 9.3e-04 | ACAN †     | 31        | 4    |
| 18  | 66470371  | 0.99                                   | 0.97 | 0.90 | 0.90 | 0.18 | 0.04 | 0.08 | 1.9e-09 | 1.3e-05 | TRAF3      | 28        | 5    |
| 20  | 17381047  | 0.24                                   | 0.61 | 0.97 | 0.98 | 0.93 | 0.99 | 0.91 | 3.1e-08 | 1.8e-04 | VEGFA †    | 48        | 1    |
| 25  | 7517270   | 0.95                                   | 0.94 | 0.93 | 0.14 | 0.27 | 0.57 | 0.19 | 1.8e-05 | 2.8e-02 | wool QTL † | 13        |      |

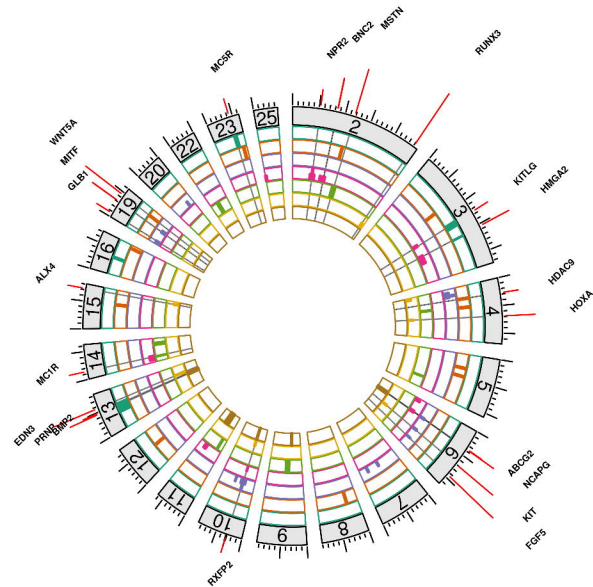

Population group

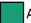

AFR

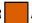

ASI

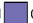

CEU

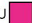

ITA

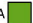

NEU

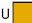

SWA

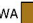

SWE

$-\log_{10}(\text{p-value})$

15  
10  
5  
0

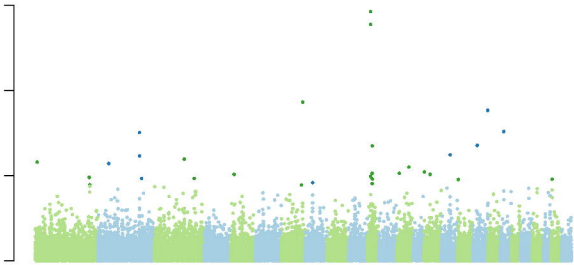

Source: https://www.biorxiv.org/content/10.1101/001453v2.full.pdf
